# Supplementary material for: Cruciferous vegetable consumption and multiple health outcomes: an umbrella review of 41 systematic reviews and meta-analyses of 303 observational studies
Source: Royal Society of Chemistry journal article supplement (doi:10.1039/d1fo03094a), 2022-01-01
Supplement: d1fo03094a1.pdf [file d1fo03094a1.pdf]

**Supplementary Table S1. Search strategy used in the umbrella review**

|                                                                                                                                                                                                        |
|--------------------------------------------------------------------------------------------------------------------------------------------------------------------------------------------------------|
| <b>Literature search strategy in PubMed</b>                                                                                                                                                            |
| 1: Brassicaceae OR brassica OR cruciferous vegetables OR broccoli OR cauliflower OR cabbage OR brussels sprout OR mustard plants OR cole slaw OR bok choy OR turnip greens OR vegetables               |
| 2: systematic review OR meta-analysis                                                                                                                                                                  |
| 3: 1 AND 2                                                                                                                                                                                             |
| <b>Literature search strategy in Web of Science</b>                                                                                                                                                    |
| 1: Search TS = (Brassicaceae OR brassica OR cruciferous vegetables OR broccoli OR cauliflower OR cabbage OR brussels sprout OR mustard plants OR cole slaw OR bok choy OR turnip greens OR vegetables) |
| 2: Search TS = (systematic review OR meta-analysis)                                                                                                                                                    |
| 3: 1 AND 2                                                                                                                                                                                             |
| <b>Literature search strategy in EMBASE</b>                                                                                                                                                            |
| 1: Brassicaceae OR brassica OR cruciferous vegetables OR broccoli OR cauliflower OR cabbage OR brussels sprout OR mustard plants OR cole slaw OR bok choy OR turnip greens OR vegetables               |
| 2: 'systematic review' OR 'meta-analysis'                                                                                                                                                              |
| 3: 1 AND 2                                                                                                                                                                                             |

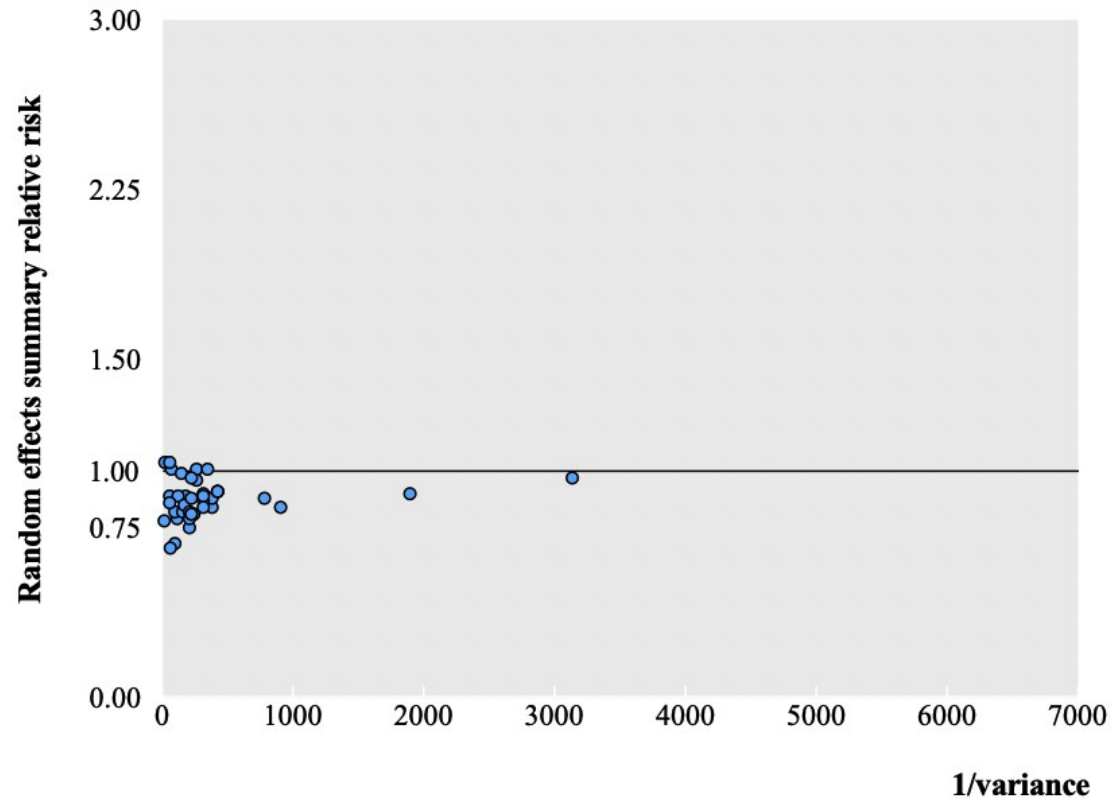

Supplementary Figure 1. Association of meta-analysis summary effects sizes with inverse of the variance.

|                            | AMSTAR Item |        |        |        |        |        |        |        |        |         |         |         |
|----------------------------|-------------|--------|--------|--------|--------|--------|--------|--------|--------|---------|---------|---------|
|                            | Item 1      | Item 2 | Item 3 | Item 4 | Item 5 | Item 6 | Item 7 | Item 8 | Item 9 | Item 10 | Item 11 | Overall |
| Andreea Zurbau , 2020      |             |        |        |        |        |        |        |        |        |         |         | H       |
| Zhanwei Zhao , 2018        |             |        |        |        |        |        |        |        |        |         |         | M       |
| Theodoros N. Sergentanis   |             |        |        |        |        |        |        |        |        |         |         | M       |
| Guo-Chong Chen Chen , 2018 |             |        |        |        |        |        |        |        |        |         |         | M       |
| Dagfinn Aune, 2017         |             |        |        |        |        |        |        |        |        |         |         | M       |
| Chang Xu, 2015             |             |        |        |        |        |        |        |        |        |         |         | M       |
| Jiyi Hu MD, 2015           |             |        |        |        |        |        |        |        |        |         |         | M       |
| Bo Han, 2015               |             |        |        |        |        |        |        |        |        |         |         | M       |
| Genevieve T se, 2014       |             |        |        |        |        |        |        |        |        |         |         | M       |
| Jun Zhao, 2013             |             |        |        |        |        |        |        |        |        |         |         | M       |
| Qi-Jun Wu, 2013            |             |        |        |        |        |        |        |        |        |         |         | M       |
| Ben Liu, 2012              |             |        |        |        |        |        |        |        |        |         |         | M       |
| Qi-Jun Wu, 2013            |             |        |        |        |        |        |        |        |        |         |         | M       |
| Xiaojiao Liu, 2013         |             |        |        |        |        |        |        |        |        |         |         | M       |
| Ben Liu, 2012              |             |        |        |        |        |        |        |        |        |         |         | M       |
| Tram Kim Lam, 2009         |             |        |        |        |        |        |        |        |        |         |         | M       |
| Elisa V. Bandera, 2007     |             |        |        |        |        |        |        |        |        |         |         | M       |
| Quanjin Dong, 2017         |             |        |        |        |        |        |        |        |        |         |         | M       |

  

|                                                                                                  |                                                                                                 |
|--------------------------------------------------------------------------------------------------|-------------------------------------------------------------------------------------------------|
|  Yes          |  H High     |
|  No           |  M Moderate |
|  Can't answer |  L Low      |

Items

1. Was an 'a priori' provided?
2. Was there duplicate study selection and data extraction?
3. Was a comprehensive literature search performed?
4. Was the status of publication (i.e. grey literature) used as an inclusion criterion?
5. Was a list of studies (included and excluded) provided?
6. Were the characteristics of the included studies provided?
7. Was the scientific quality of the included studies assessed and documented?
8. Was the scientific quality of the included studies used appropriately in formulation conclusion?
9. Were the methods used to combine the findings of studies appropriate?
10. Was the likelihood of publication bias assessed?
11. Was the conflict of interest included?

Each question can be answered with “yes,” “no,” “can't answer,” and “not applicable.”

A “yes” scores one point, whereas the other answers score 0 points.

High quality: 8 to 11 points. Moderate quality: 4 to 7 points. Low quality: 0 to 3 points

Supplementary Figure 2 Detailed evaluation of the methodological quality with AMSTAR
